# Supplementary material for: Theranostic F-SLOH mitigates Alzheimer's disease pathology involving TFEB and ameliorates cognitive functions in Alzheimer's disease models
Source: PubMed Central journal article supplement — Redox Biol. 2022 Mar 8;51:102280. doi: 10.1016/j.redox.2022.102280 (PMC8921490; doi:10.1016/j.redox.2022.102280), 2022-03-08

## Supplementary figure S1

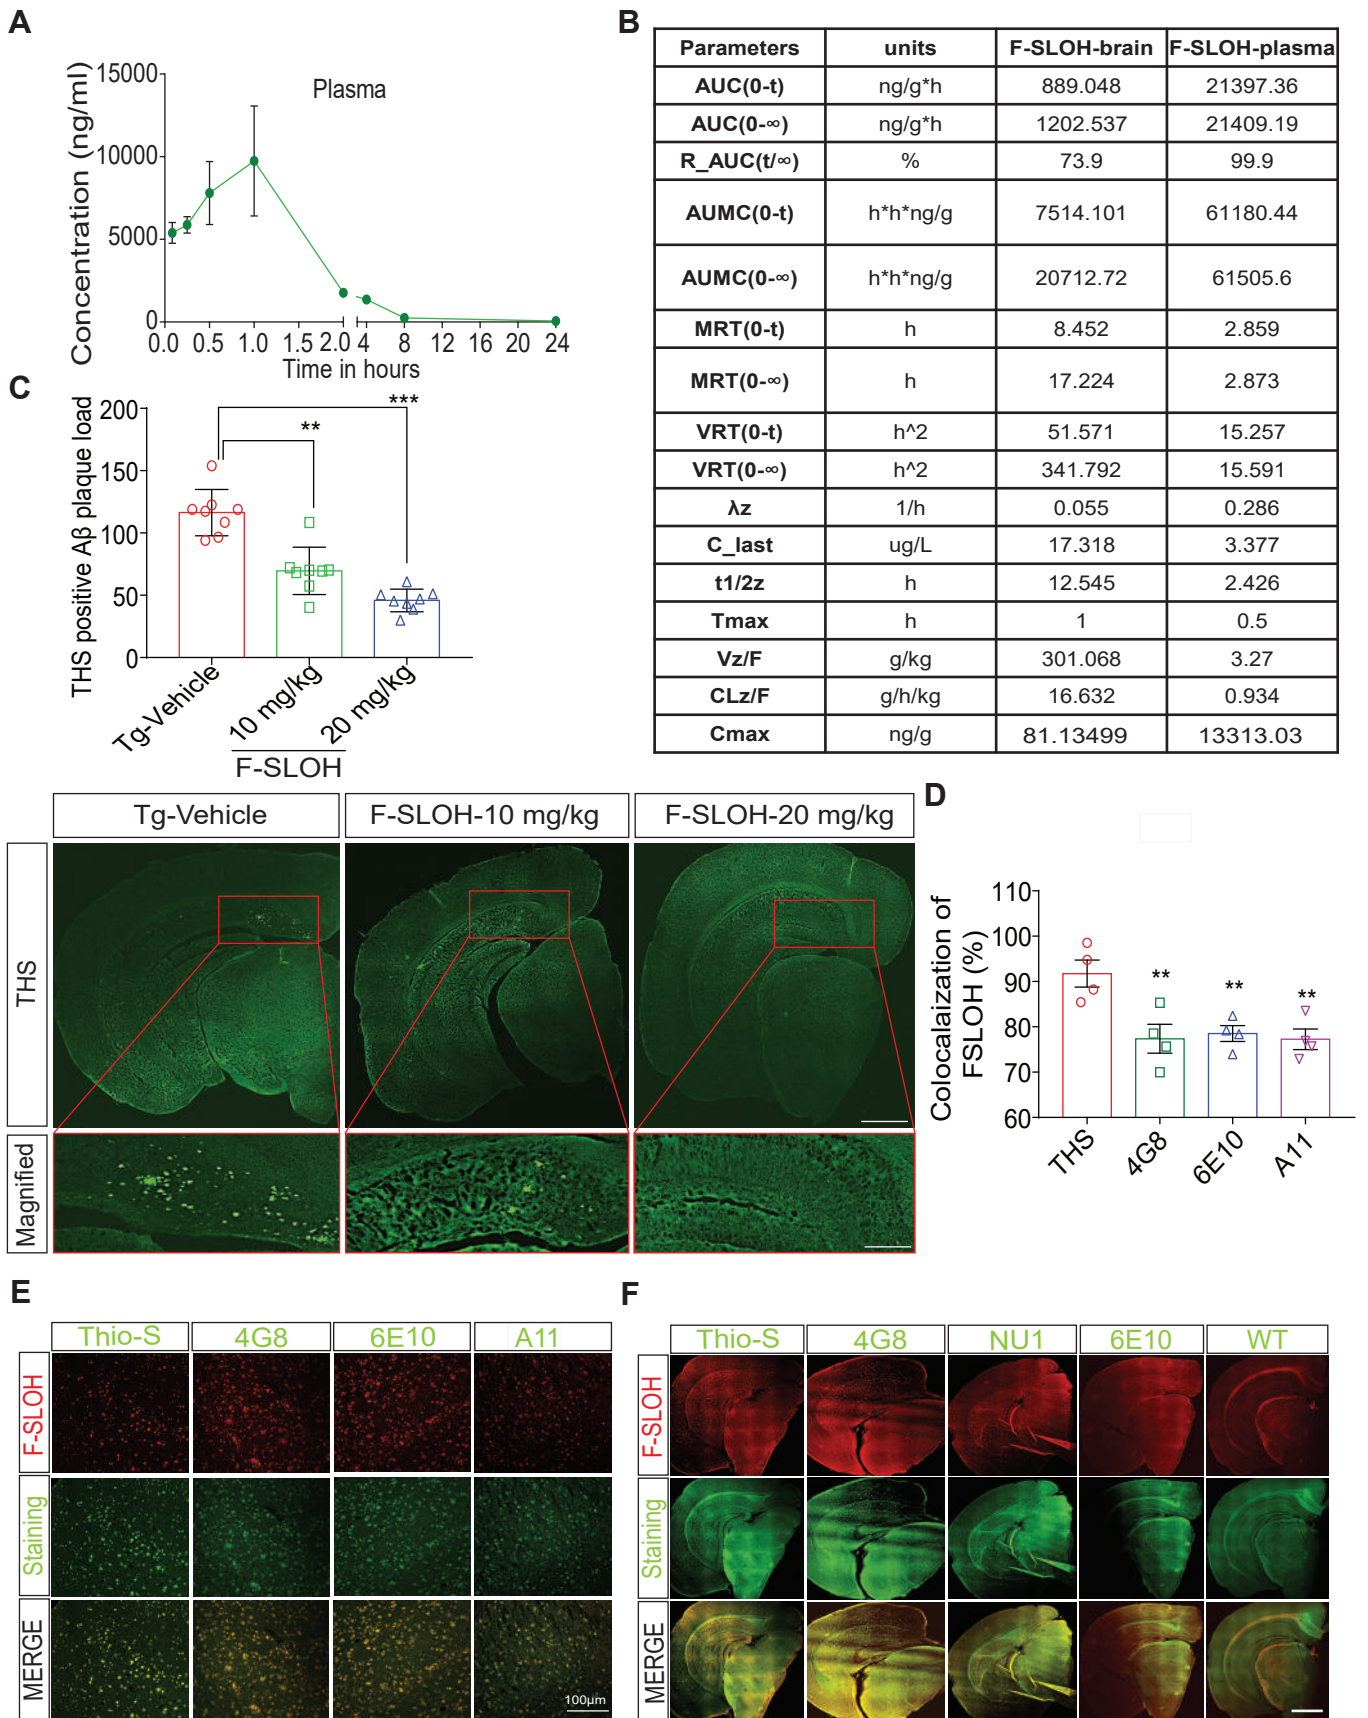

## Supplementary figure S2

**A**

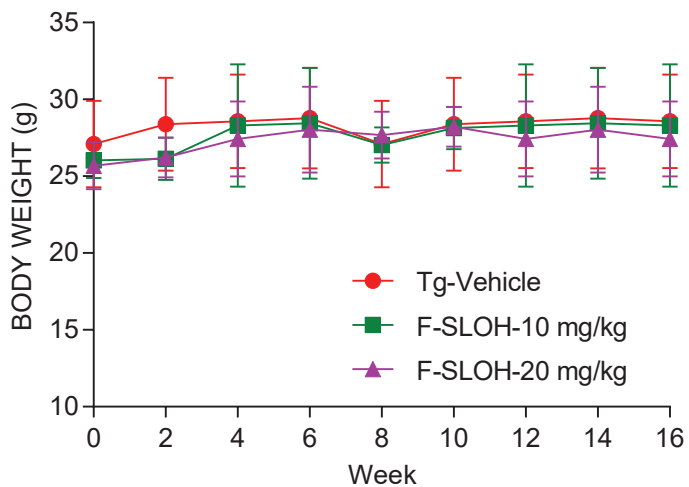

**B**

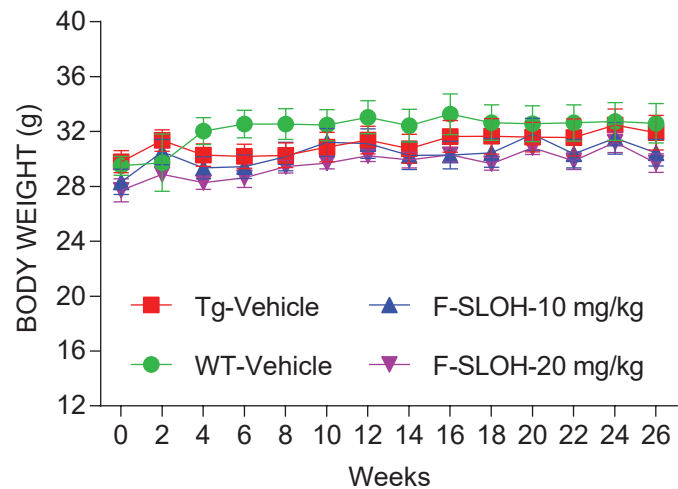

**C**

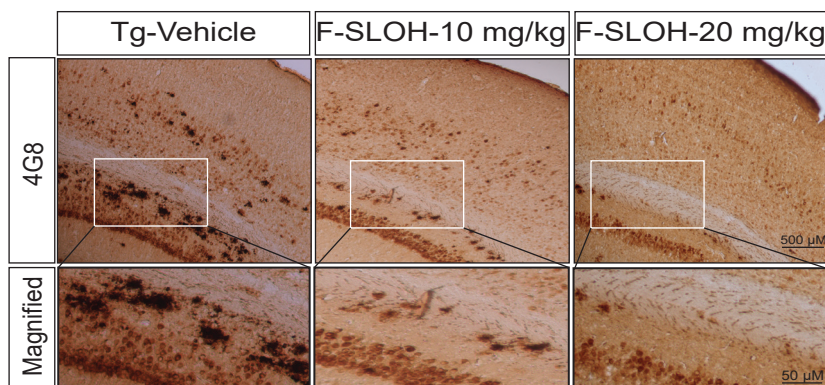

**D**

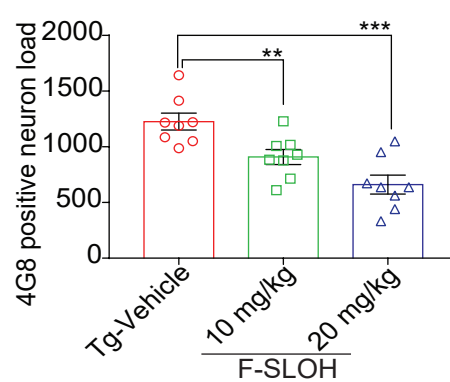

**E**

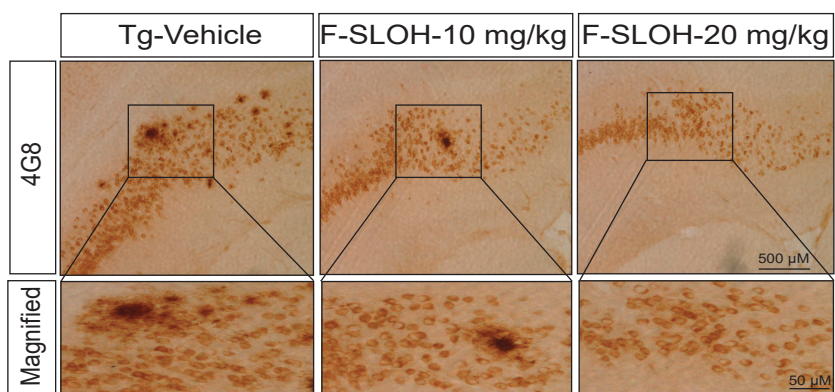

**F**

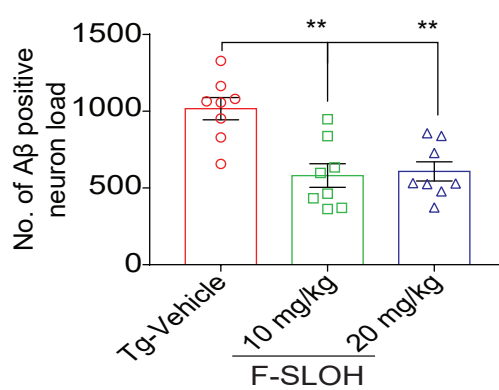

### Supplementary figure S3

**A**

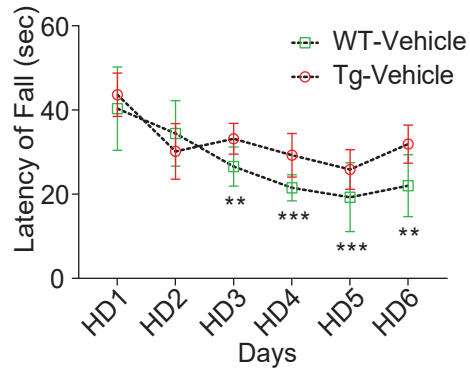

**B**

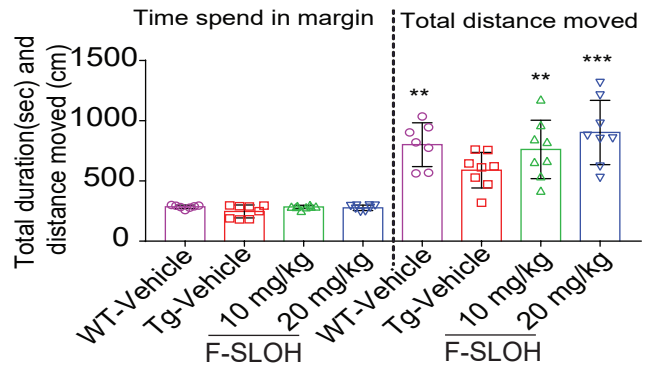

**C**

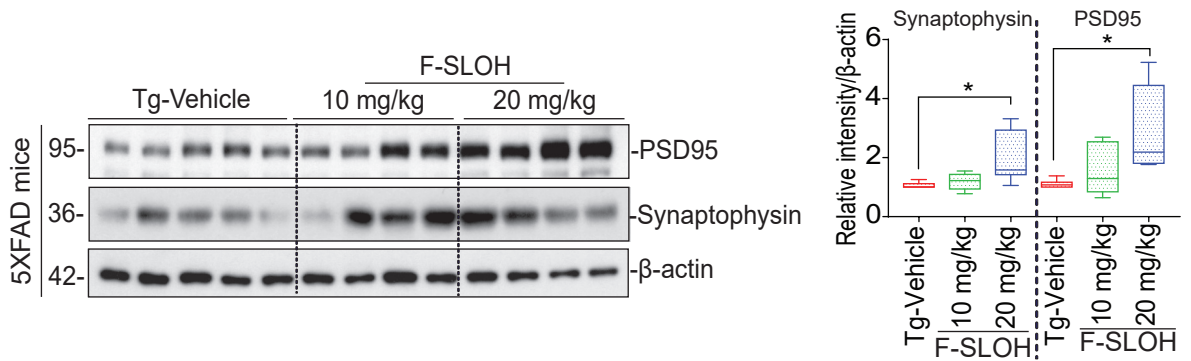

**D**

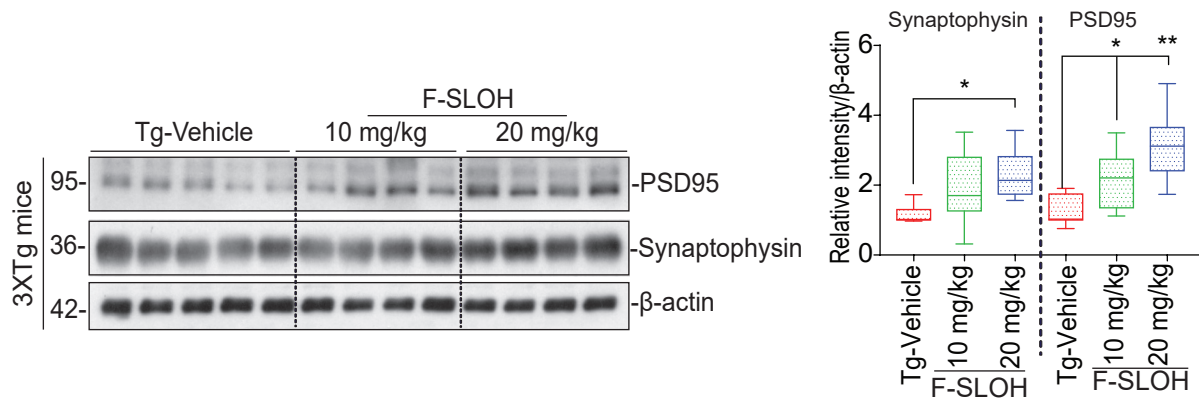

Supplementary figure S4

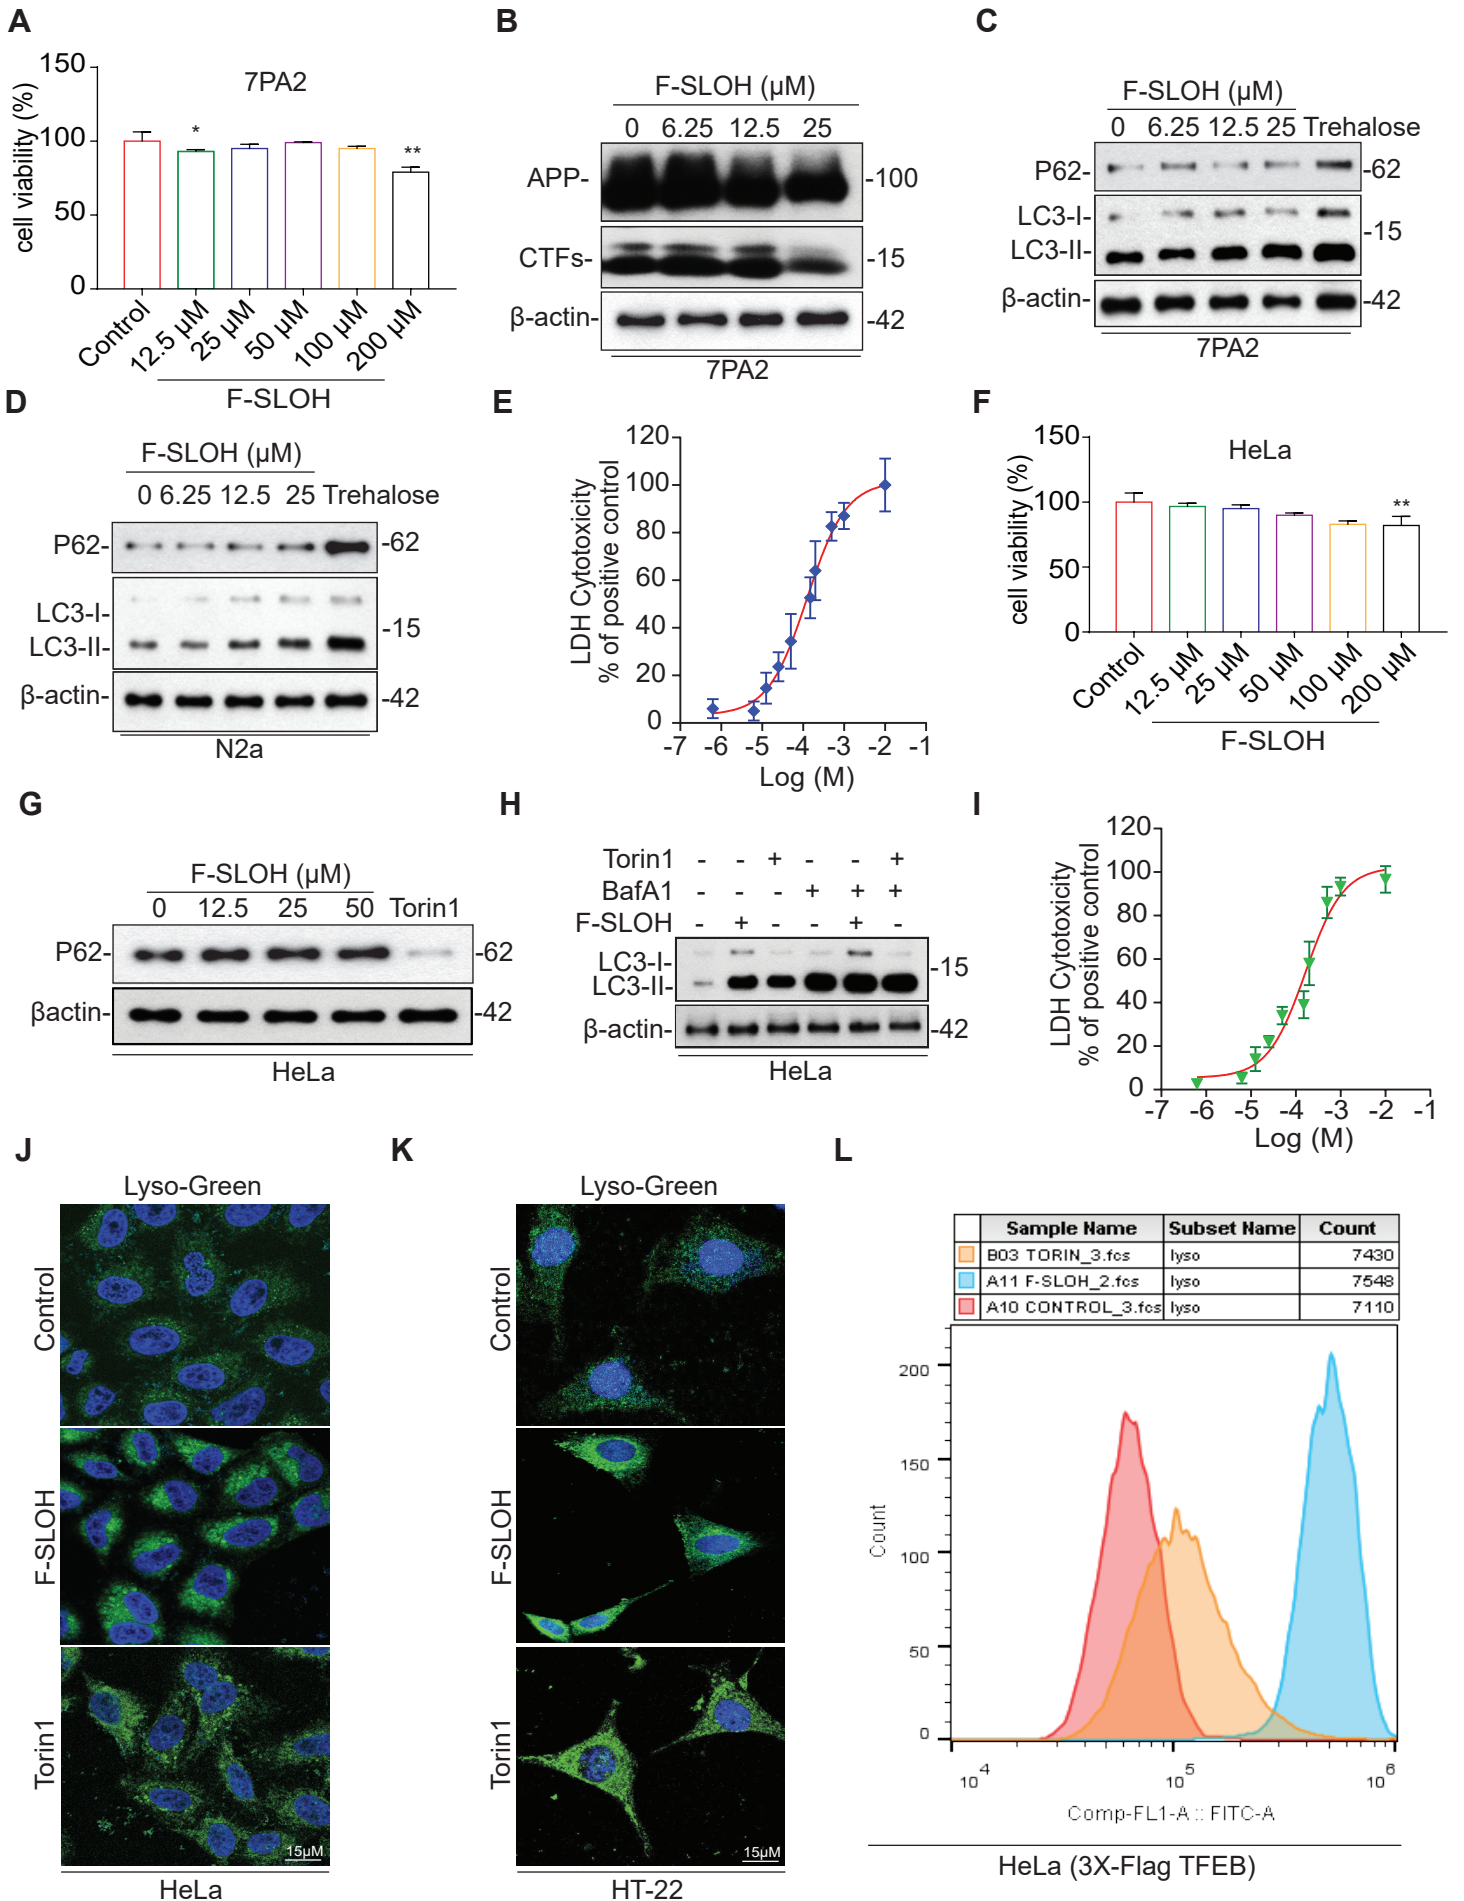

# Supplementary figure S5

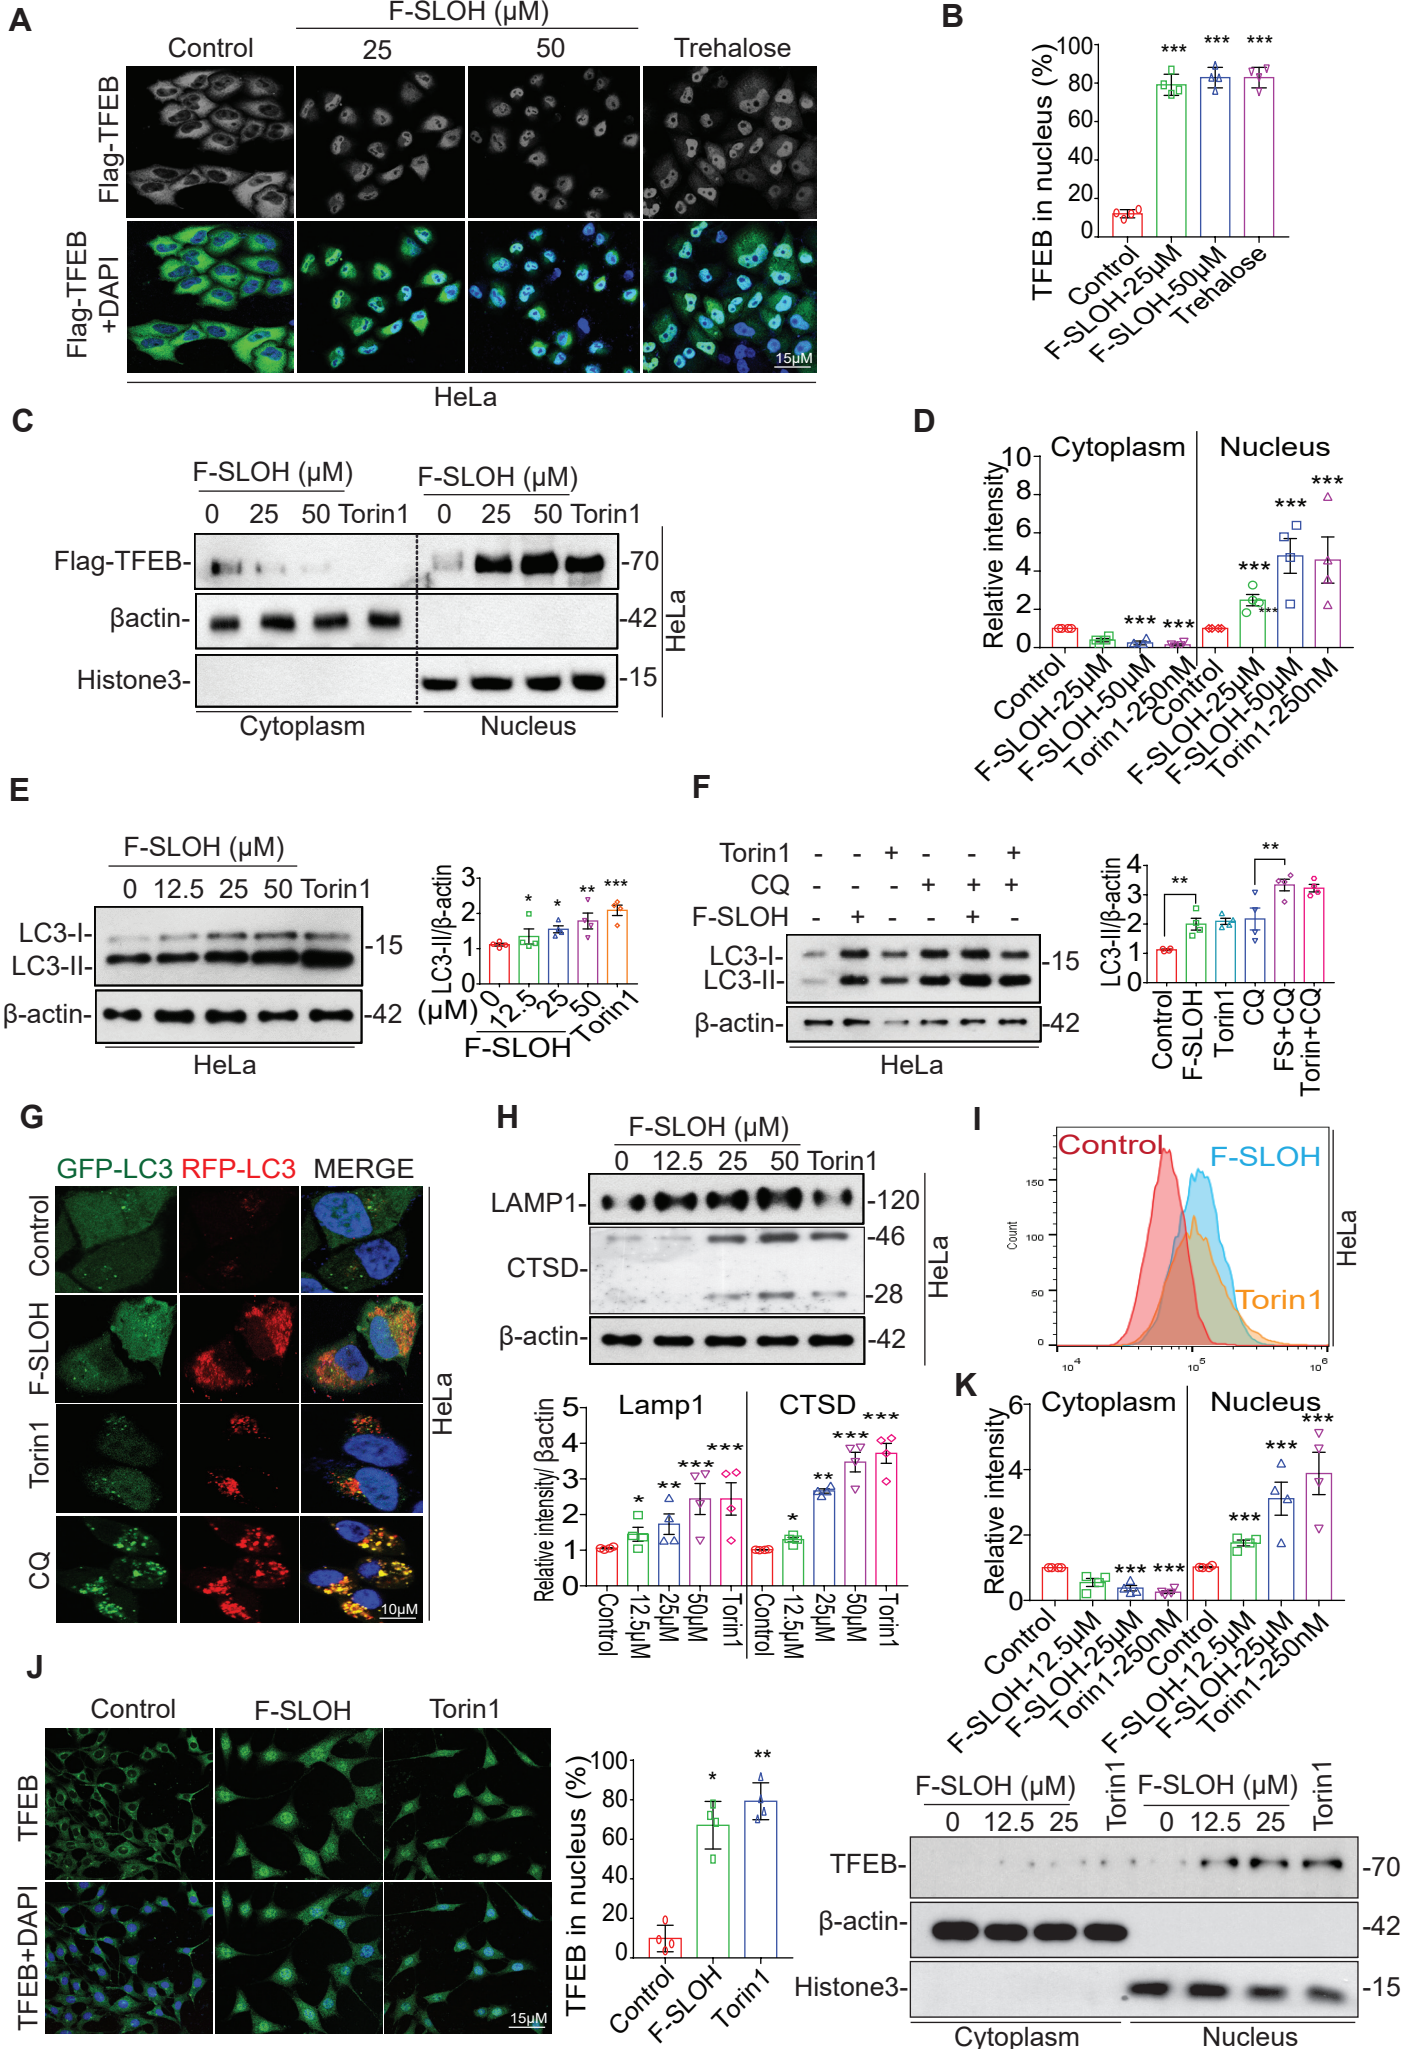

# Supplementary figure S6

**A**

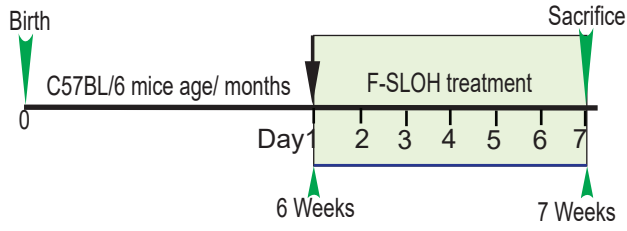

**B**

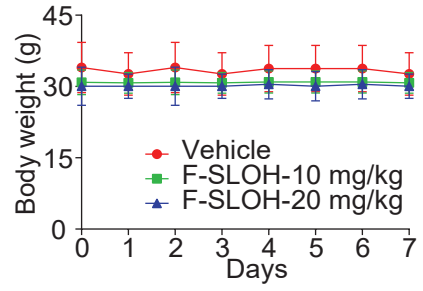

**C**

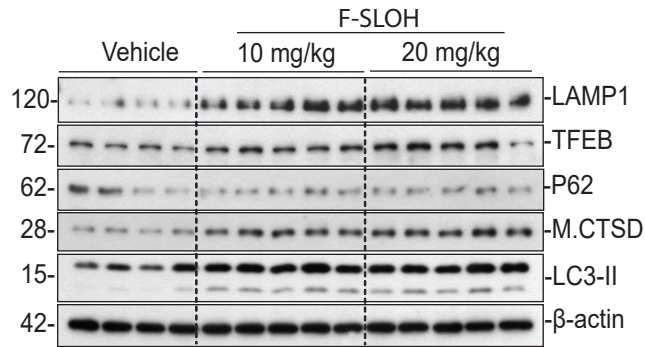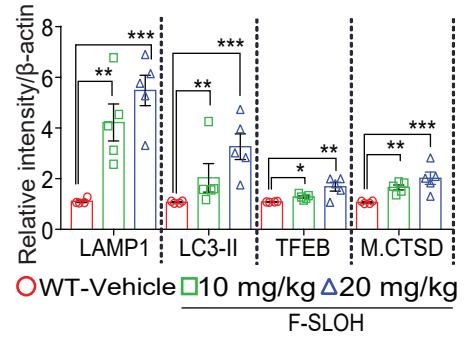

**D**

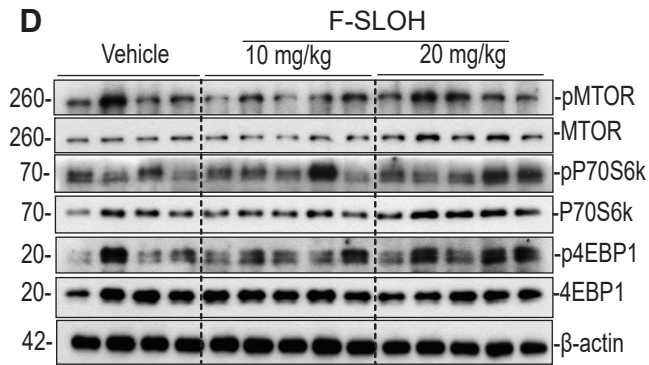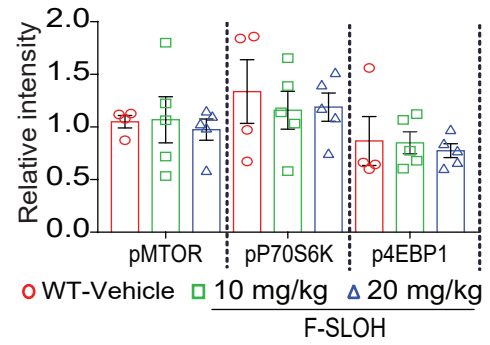

Supplementary figure S7

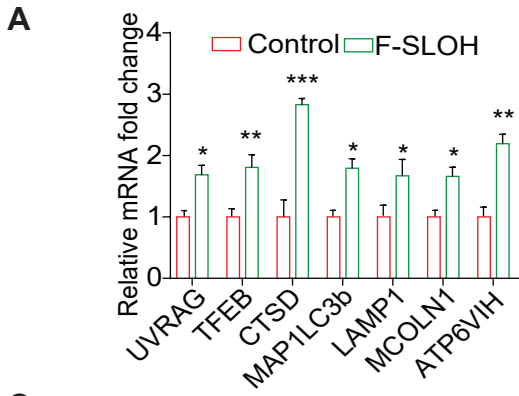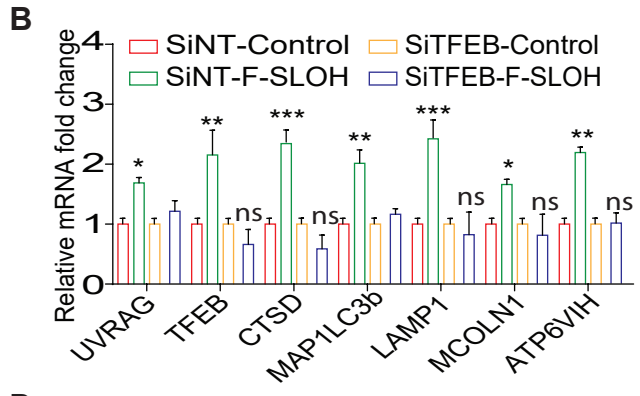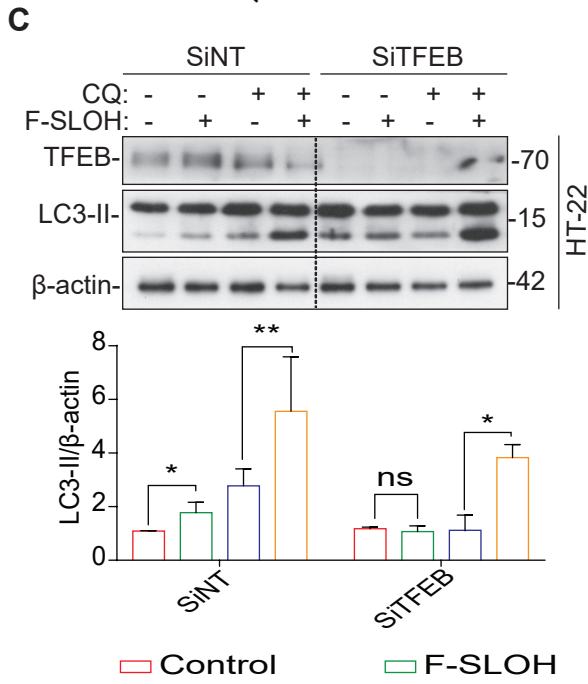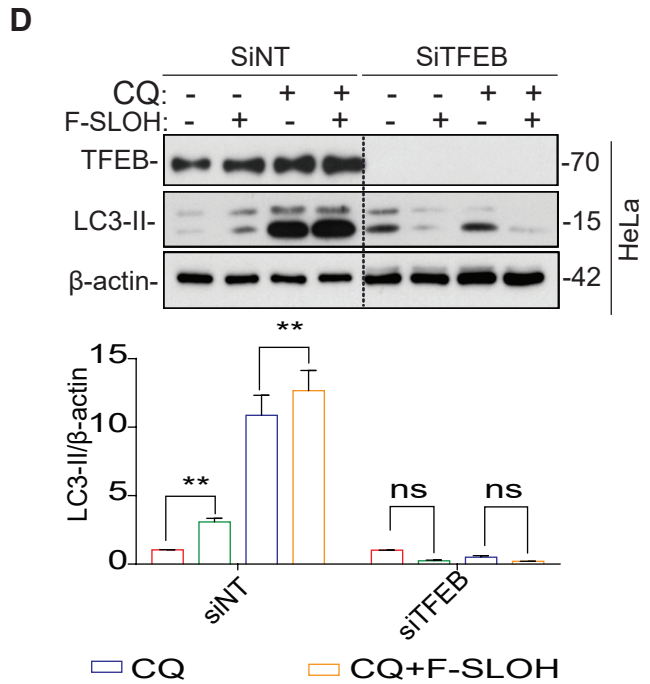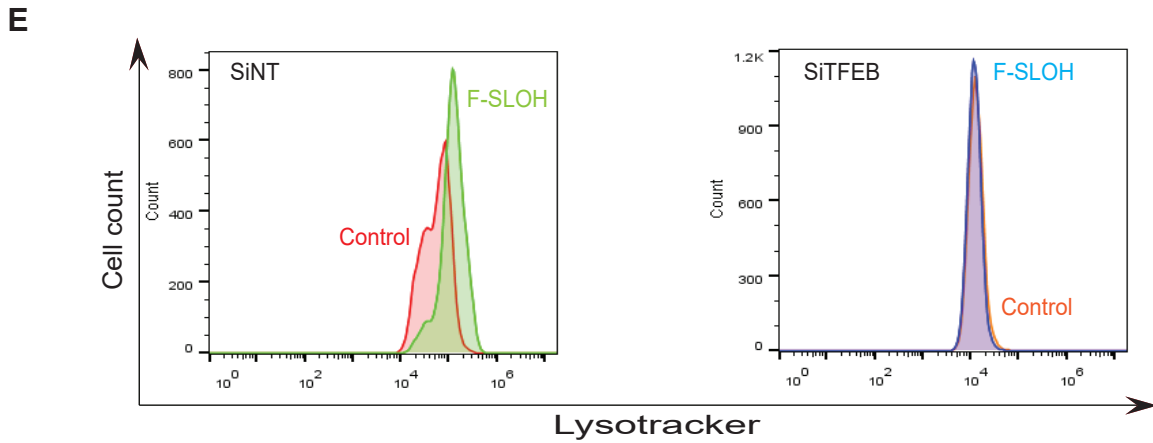

## Supplementary figure S8

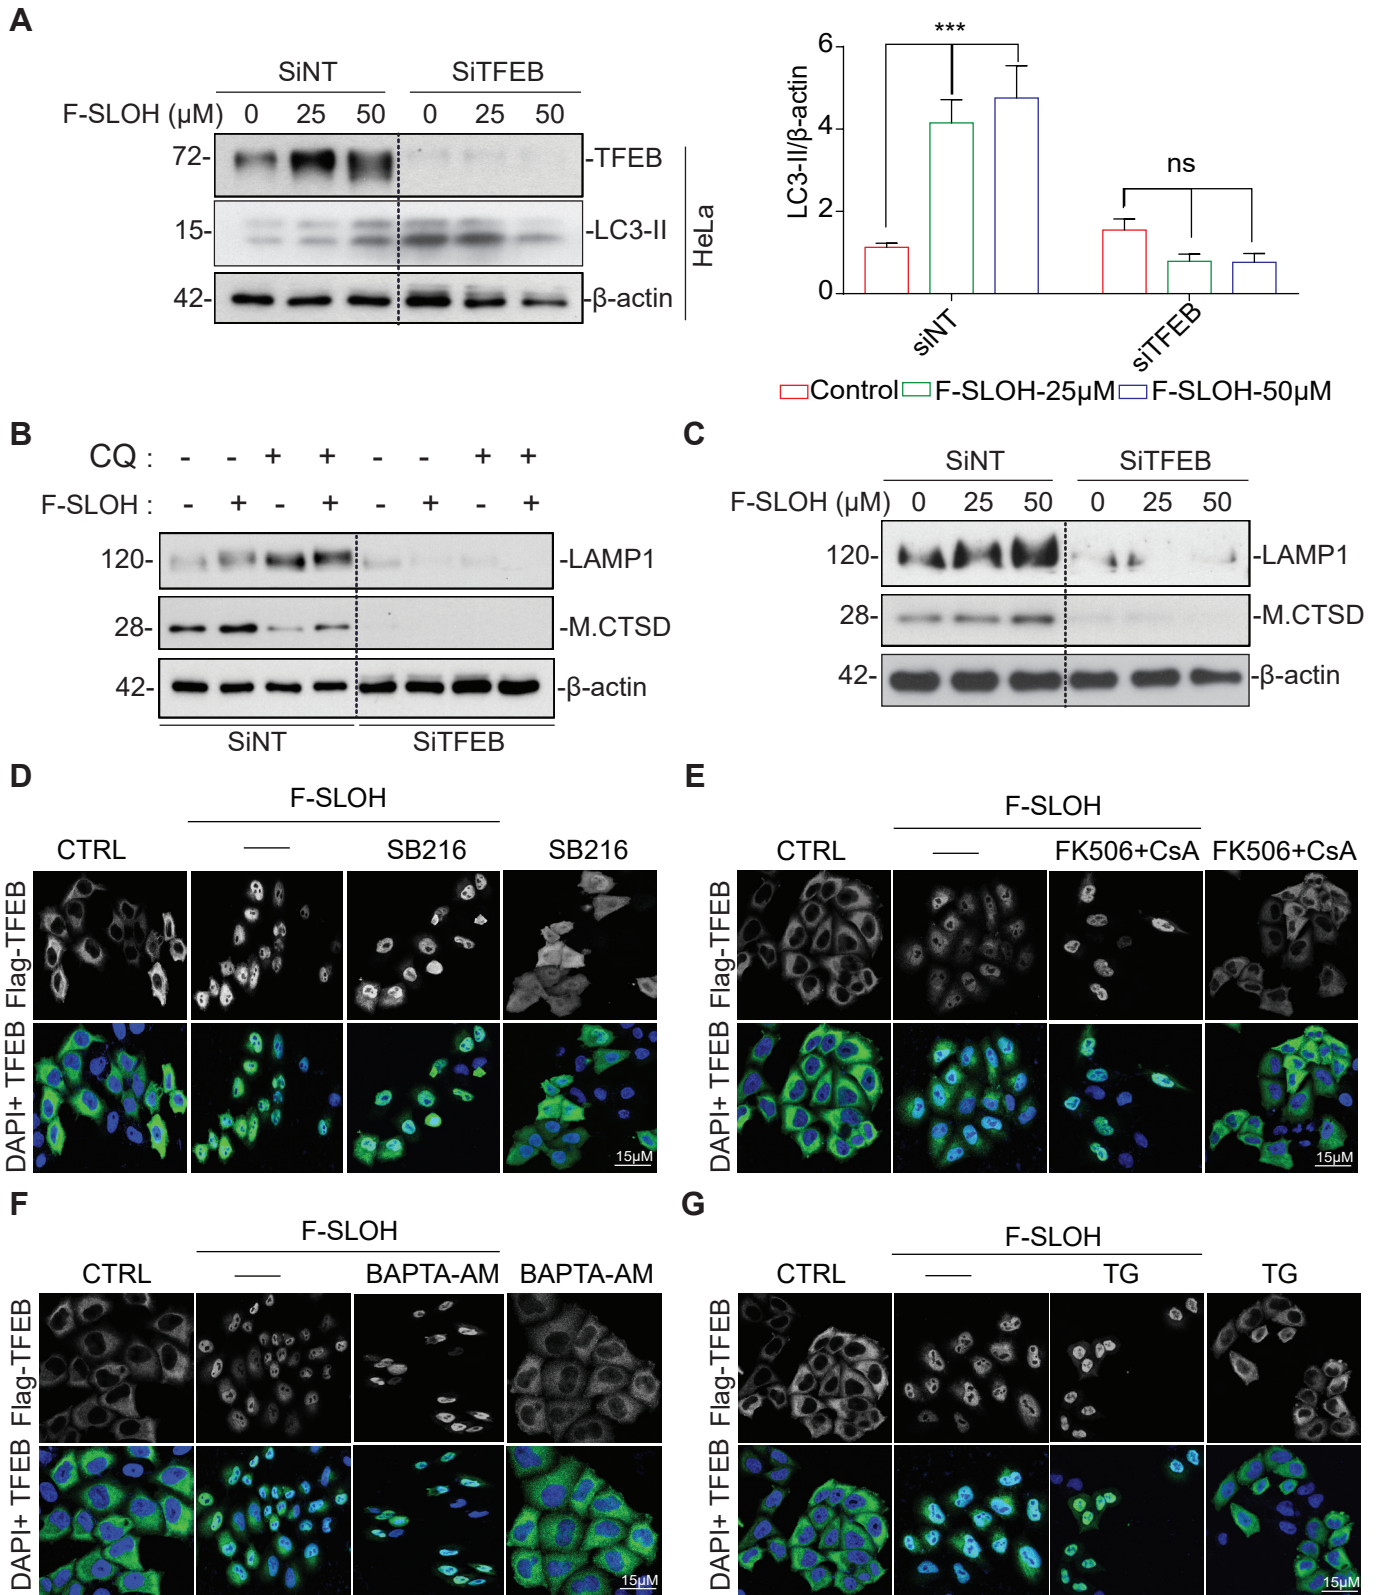



# Supplementary figure S9

**A**

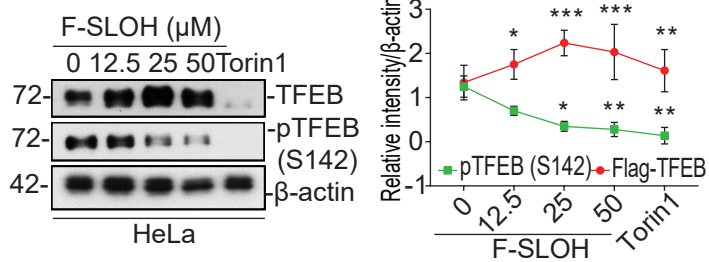

**B**

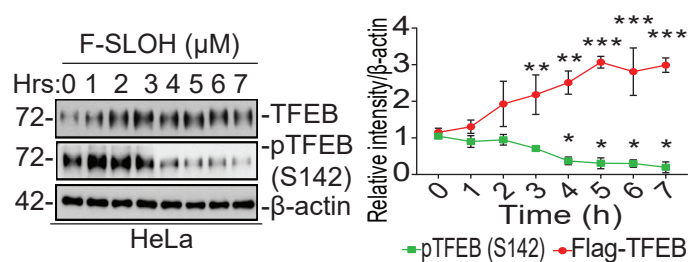

**C**

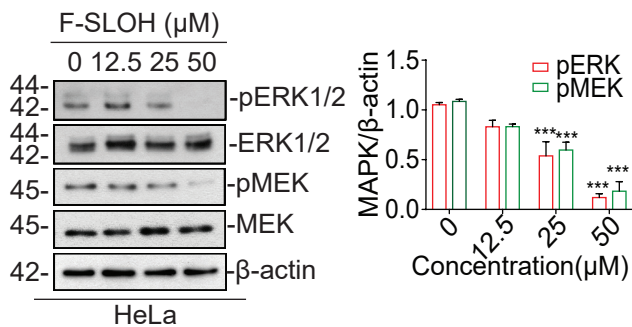

**D**

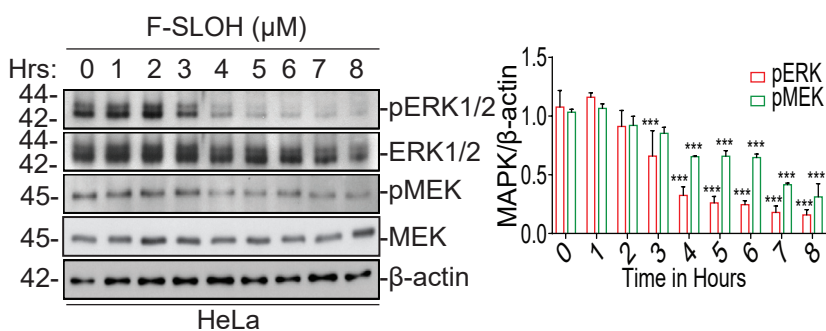

**E**

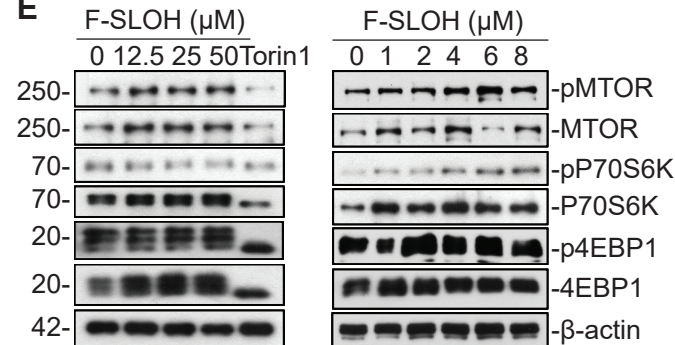

**F**

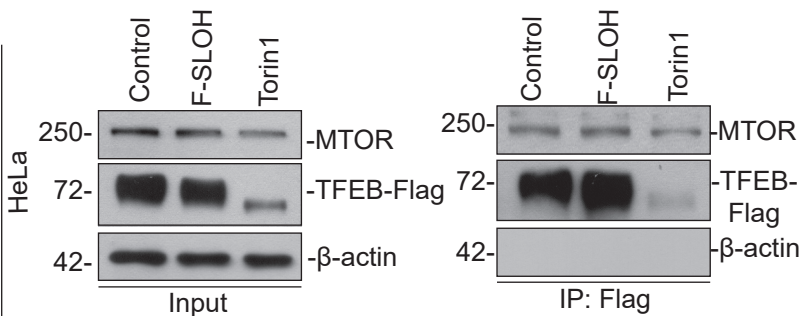

**G**

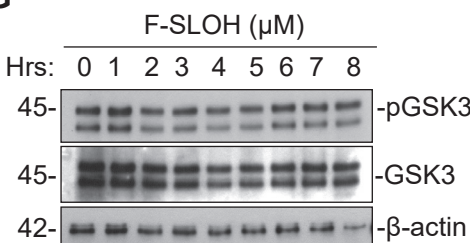

**H**

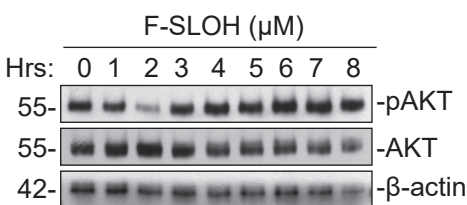

**I**

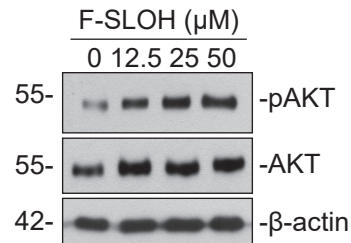

**J**

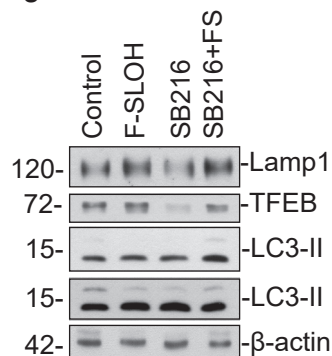

**K**

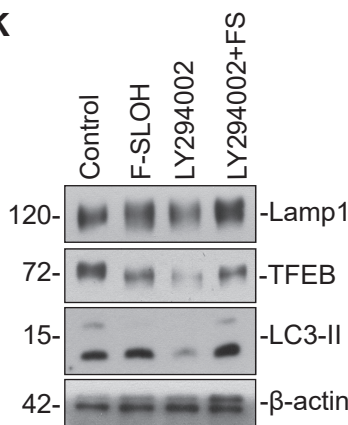

**L**

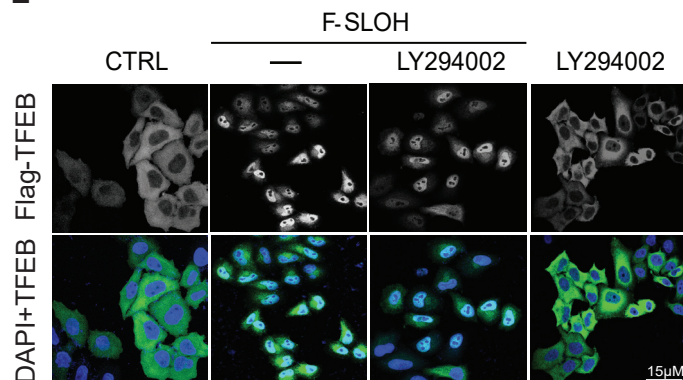

**M**

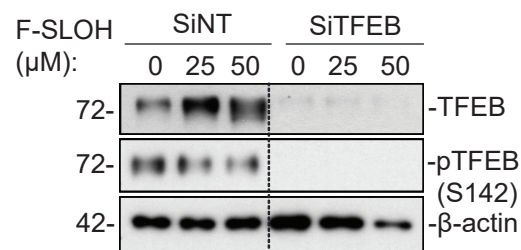

**N**

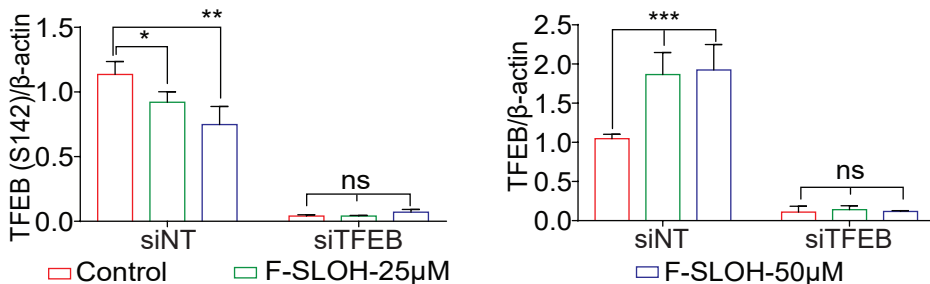

## Supplementary figure S10

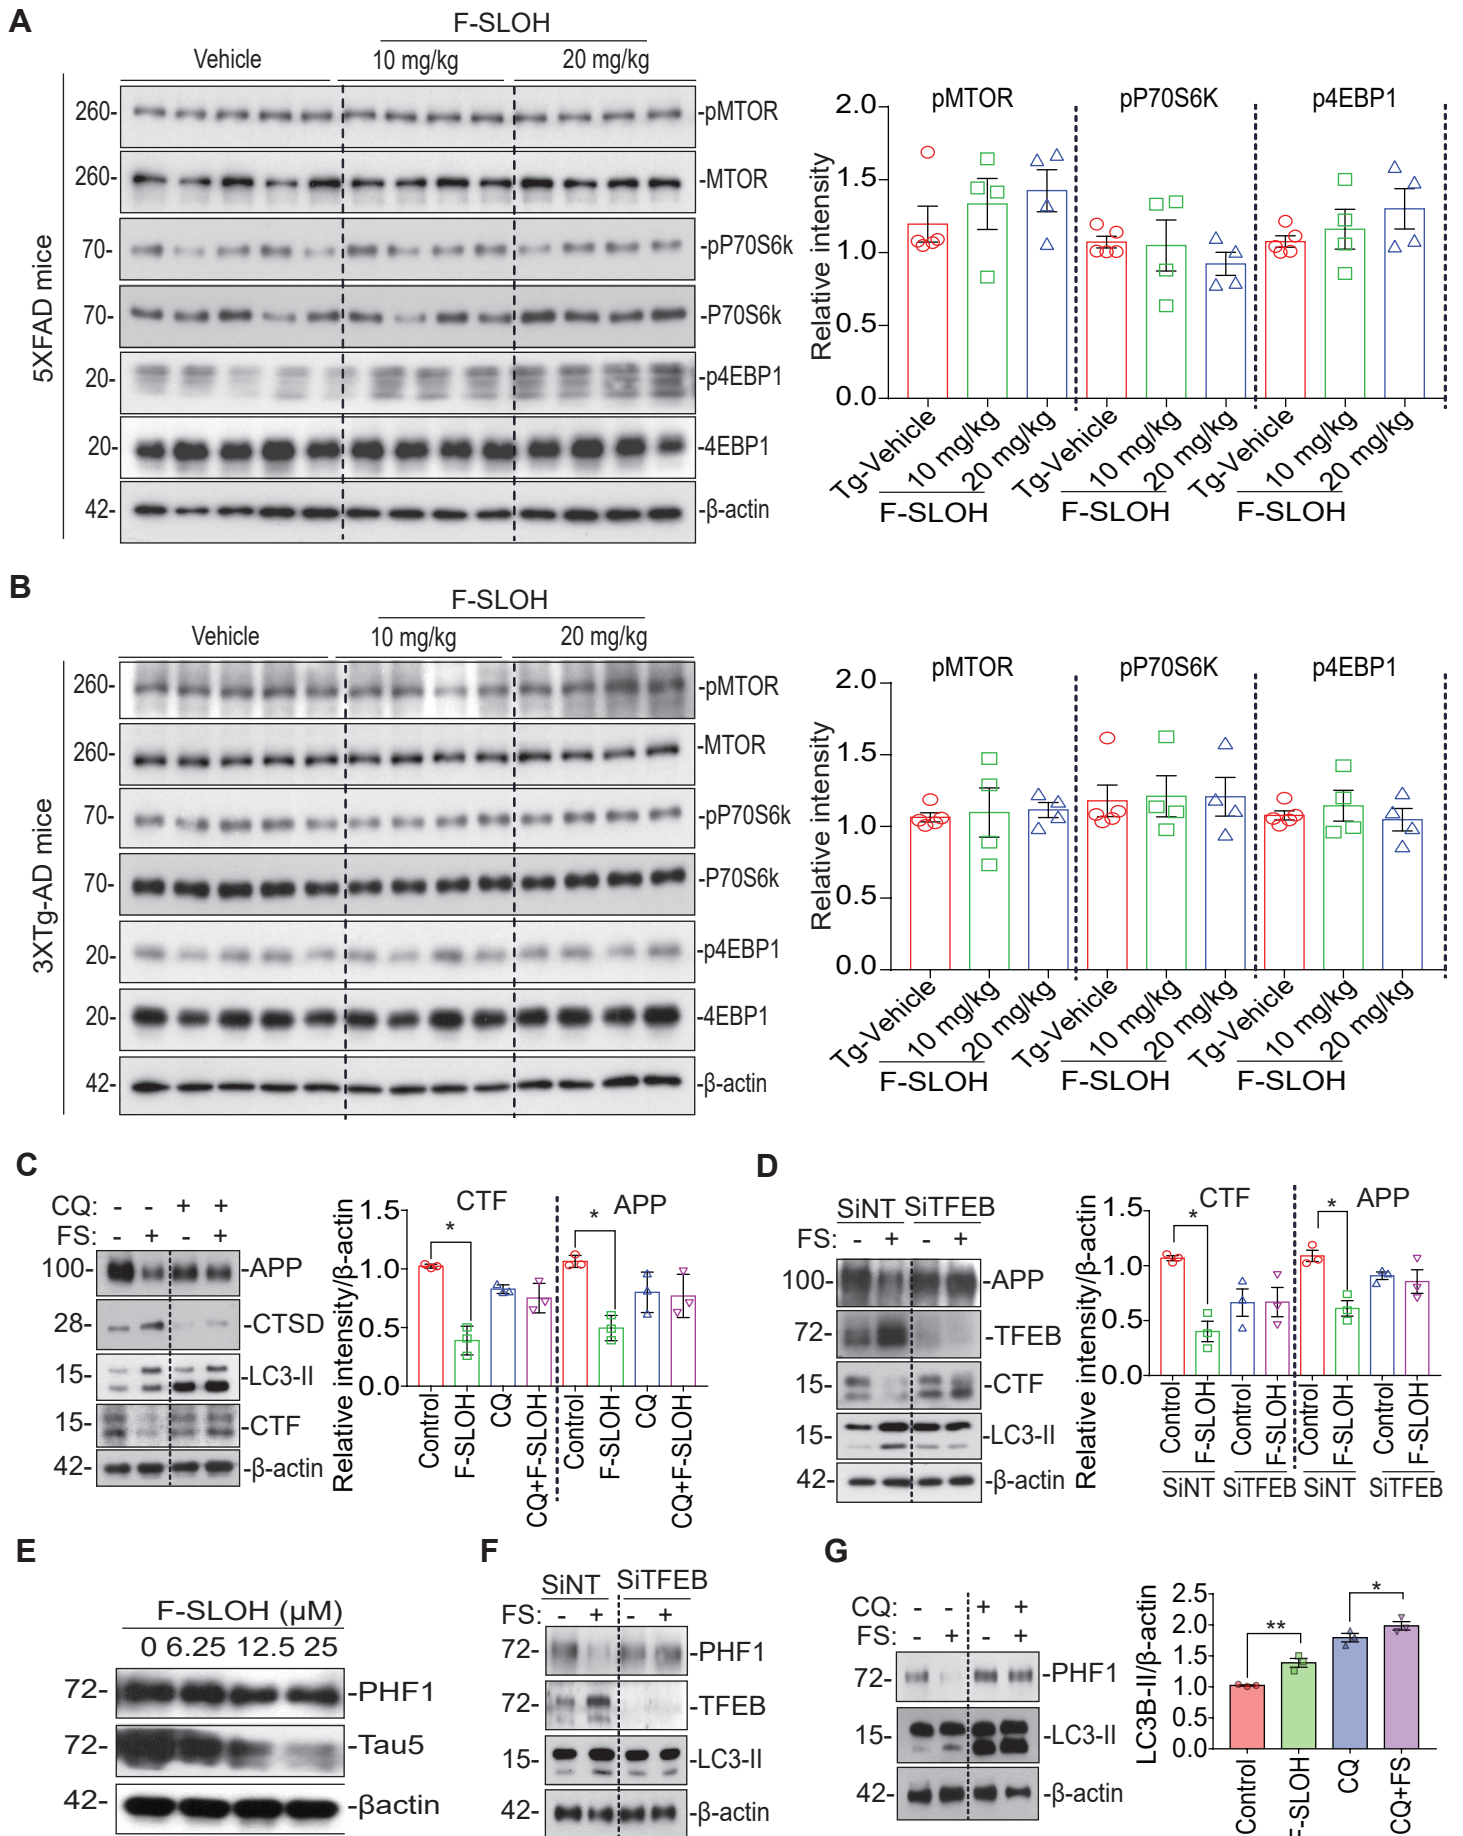

Supplement: mmc1.pdf [file mmc1.pdf]
